# Supplementary material for: Secretion of bispecific protein of anti-PD-1 fused with TGF-β trap enhances antitumor efficacy of CAR-T cell therapy
Source: PubMed Central journal article supplement — Mol Ther Oncolytics. 2021 Apr 2;21:144–57. doi: 10.1016/j.omto.2021.03.014 (PMC8082048; doi:10.1016/j.omto.2021.03.014), 2021-04-02
Supplement: mmc1.pdf [file mmc1.pdf]

**Supplemental information**

**Secretion of bispecific protein of anti-PD-1  
fused with TGF- $\beta$  trap enhances antitumor  
efficacy of CAR-T cell therapy**

**Xianhui Chen, Shuai Yang, Si Li, Yun Qu, Hsuan-Yao Wang, Jiangyue Liu, Zachary S. Dunn, Gunce E. Cinay, Melanie A. MacMullan, Fangheng Hu, Xiaoyang Zhang, and Pin Wang**

## Supplementary Materials

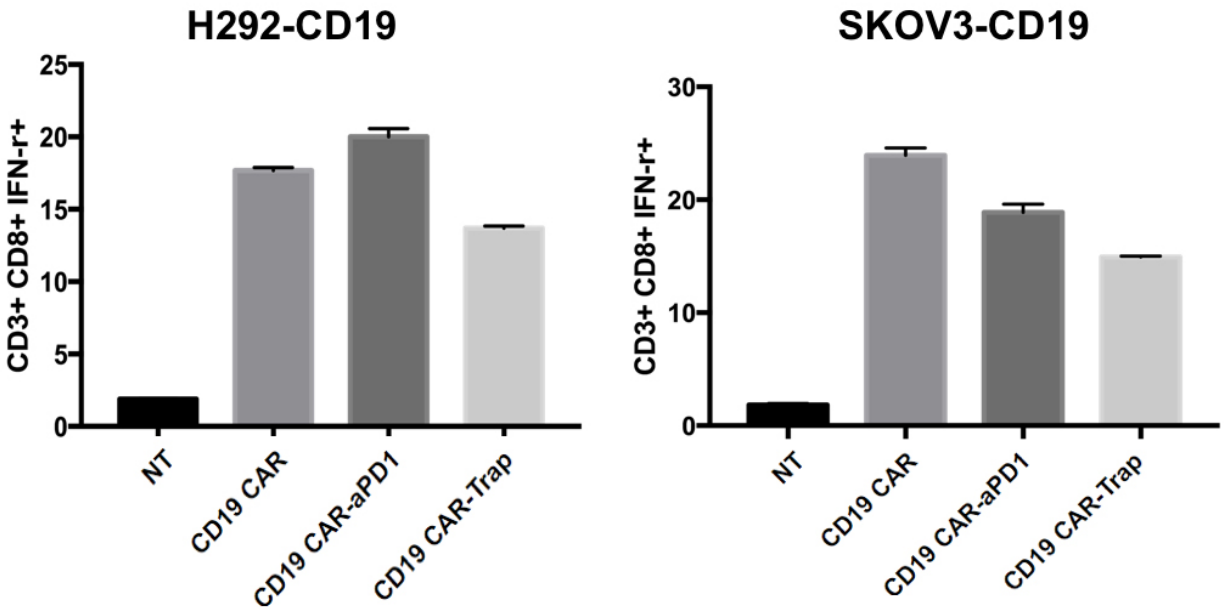

**Supplementary Fig. S1.** IFN- $\gamma$  expression was measured by flow cytometry after CAR T cells were co-cultured with H292-CD19 cells and SKOV3-CD19 cells for 16 hours in the presence of protein transport inhibitor Brefeldin A. The percentage of IFN- $\gamma$ + T cells over total CD8+ T cells was shown in bar graphs (n=3, mean  $\pm$  SD; ns, not significant; \*\*P < 0.01).

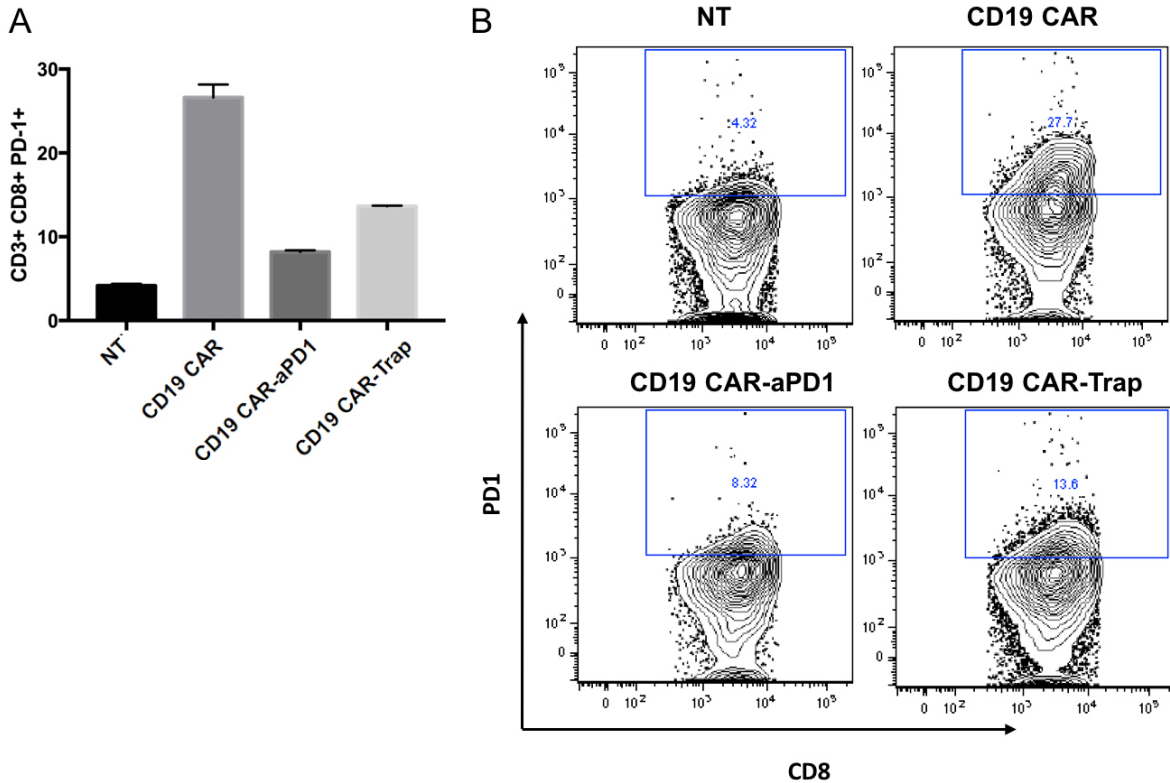

**Supplementary Fig. S2.** CAR-T cells were co-cultured with H292-CD19 cells for 24 hours. **(A)** The percentages of PD-1+CD8+ T cells over total CD8+ T cells were shown in bar graphs. (n=3, mean  $\pm$  SD; \*\*\*P < 0.001). **(B)** CD3+ T cells were shown in each panel. PD-1+CD8+ T cells were gated, and their percentage over total CD3+ T cells was shown in each scatter plot.

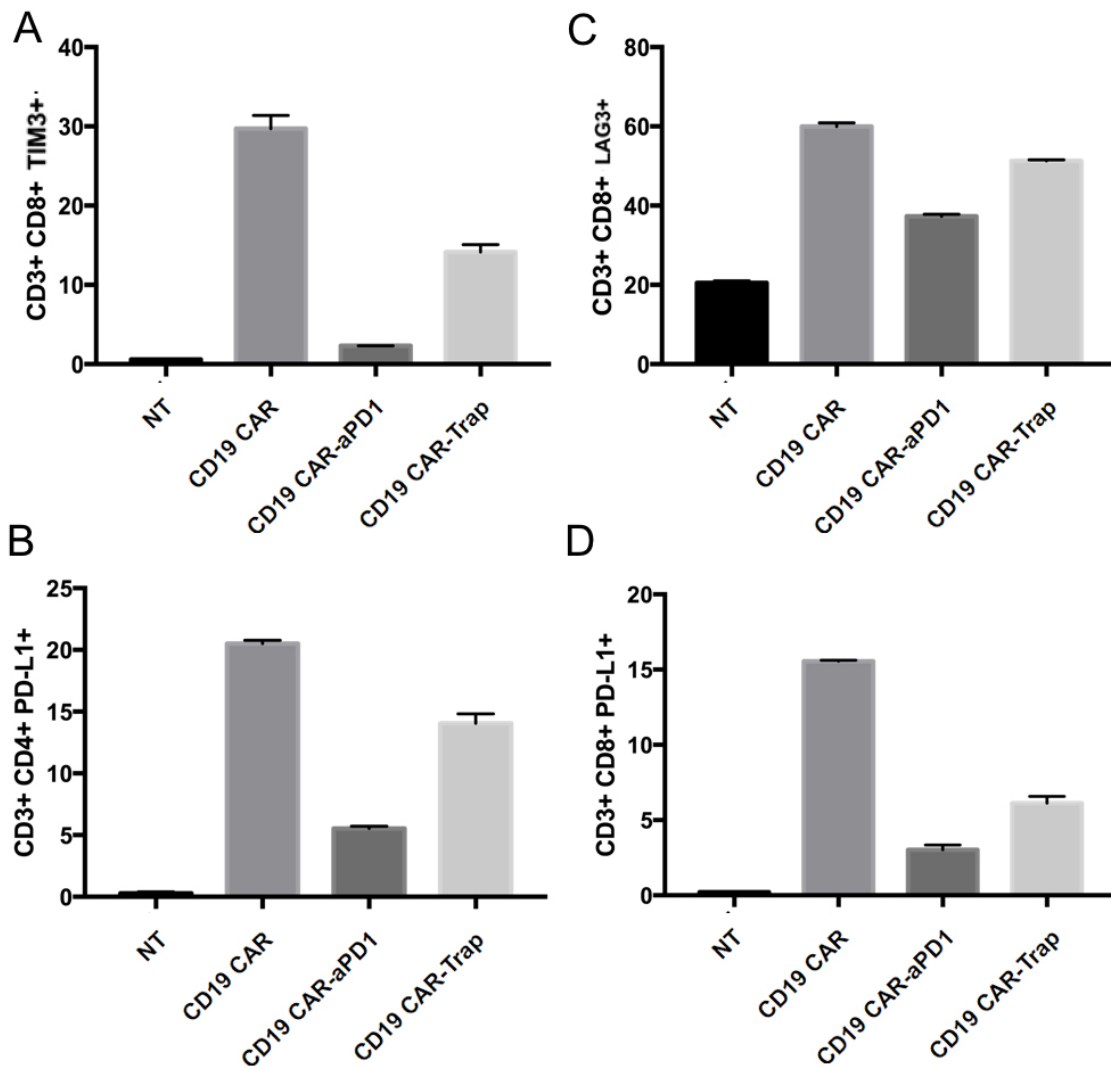

**Supplementary Fig. S3.** CAR T cells were co-cultured with H292-CD19 cells for 24 hours. **(A, B)** TIM3 expression and LAG3 expression were measured by flow cytometry. The percentages of TIM3<sup>+</sup>CD8<sup>+</sup> and LAG3<sup>+</sup>CD8<sup>+</sup> T cells over total CD8<sup>+</sup> T cells were shown in bar graphs. (n=3, mean  $\pm$  SD; ns, not significant, \*\*P < 0.01). **(C, D)** PD-L1 expression was measured by flow cytometry. The percentages of PD-L1<sup>+</sup>CD4<sup>+</sup> and PD-L1<sup>+</sup>CD8<sup>+</sup> over total CD4<sup>+</sup> and CD8<sup>+</sup> T cells were shown in bar graphs. (n=3, mean  $\pm$  SD; \*P < 0.05; \*\*P < 0.01).

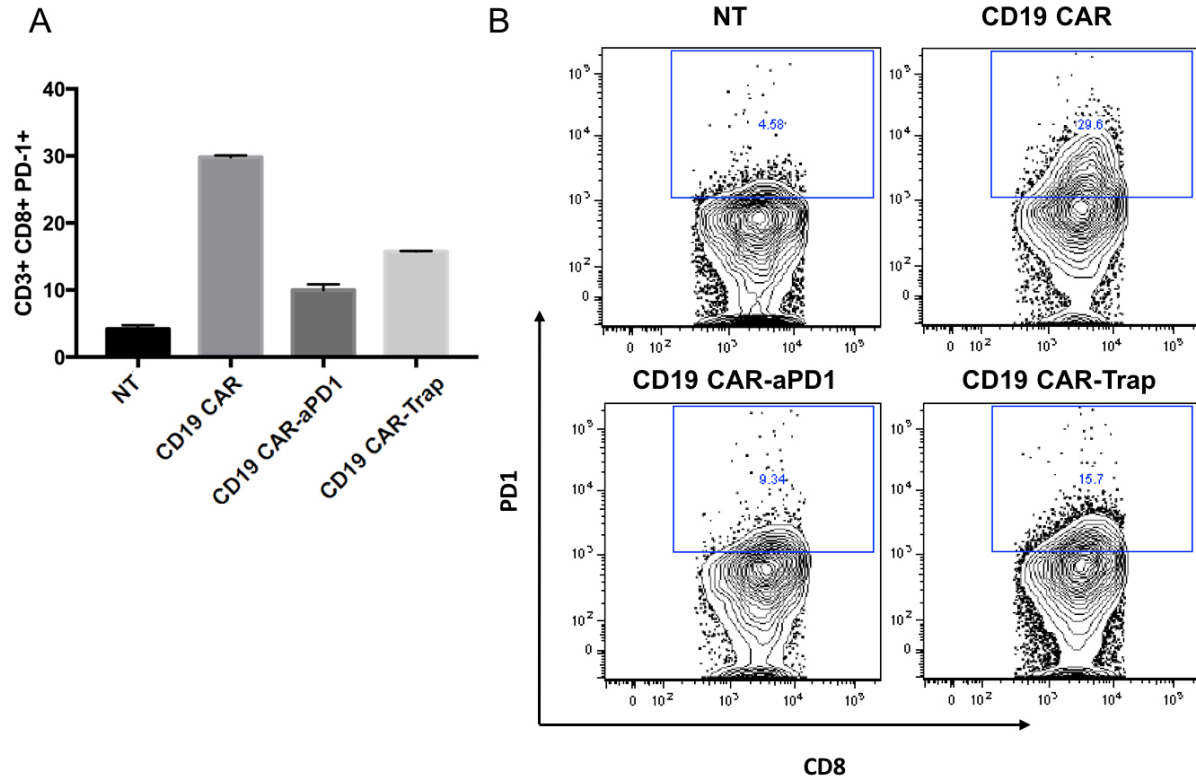

**Supplementary Fig. S4.** CAR-T cells were co-cultured with SKOV3-CD19 cells for 24 hours. **(A)** The percentages of PD-1<sup>+</sup>CD8<sup>+</sup> T cells over total CD8<sup>+</sup> T cells were shown in bar graphs. (n=3, mean ± SD; \*\*\*P < 0.001). **(B)** CD3<sup>+</sup> T cells were shown in each panel. PD-1<sup>+</sup>CD8<sup>+</sup> T cells were gated, and their percentage over total CD3<sup>+</sup> T cells was shown in each scatter plot.

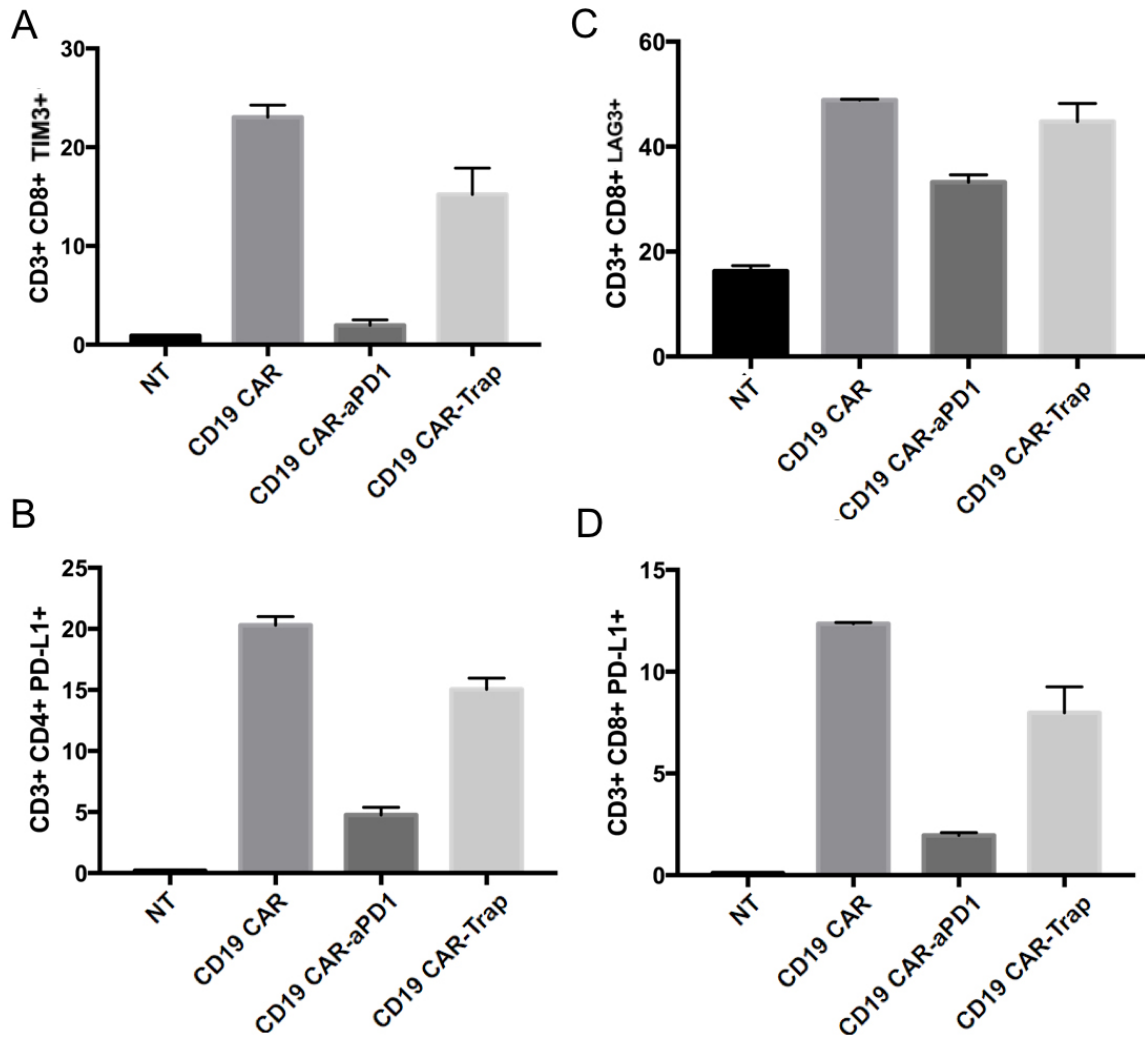

**Supplementary Fig. S5.** CAR T cells were co-cultured with SKOV3-CD19 cells for 24 hours. **(A, B)** TIM3 expression and LAG3 expression were measured by flow cytometry. The percentages of TIM3<sup>+</sup>CD8<sup>+</sup> and LAG3<sup>+</sup>CD8<sup>+</sup> T cells over total CD8<sup>+</sup> T cells were shown in bar graphs. (n=3, mean ± SD; ns, not significant, \*\*P < 0.01). **(C, D)** PD-L1 expression was measured by flow cytometry. The percentages of PD-L1<sup>+</sup>CD4<sup>+</sup> and PD-L1<sup>+</sup>CD8<sup>+</sup> T cells over total CD4<sup>+</sup> and CD8<sup>+</sup> T cells were shown in bar graphs. (n=3, mean ± SD; \*P < 0.05; \*\*P < 0.01).

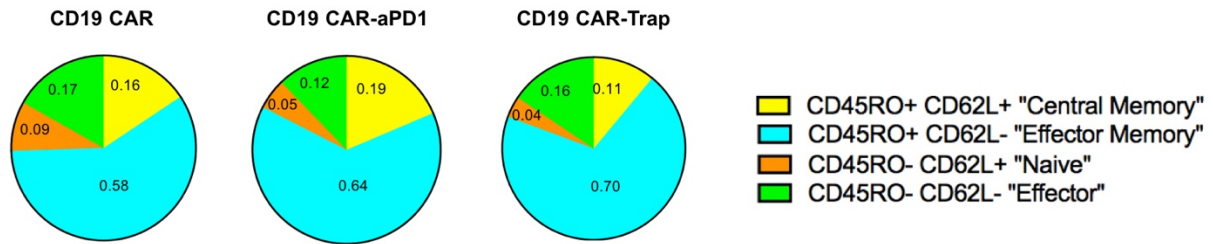

**Supplementary Fig. S6.** Tumor samples collected from CD19 CAR, CD19 CAR- $\alpha$ PD1 or CD19 CAR-Trap T cell-treated groups on day 12 post-treatment were analyzed for memory status. Samples were stained for human CD45RO and CD62L and then measured by flow cytometry. The average percentages of naïve T cells, effector memory T cells, central memory T cells and effector T cells were shown in pie graphs.

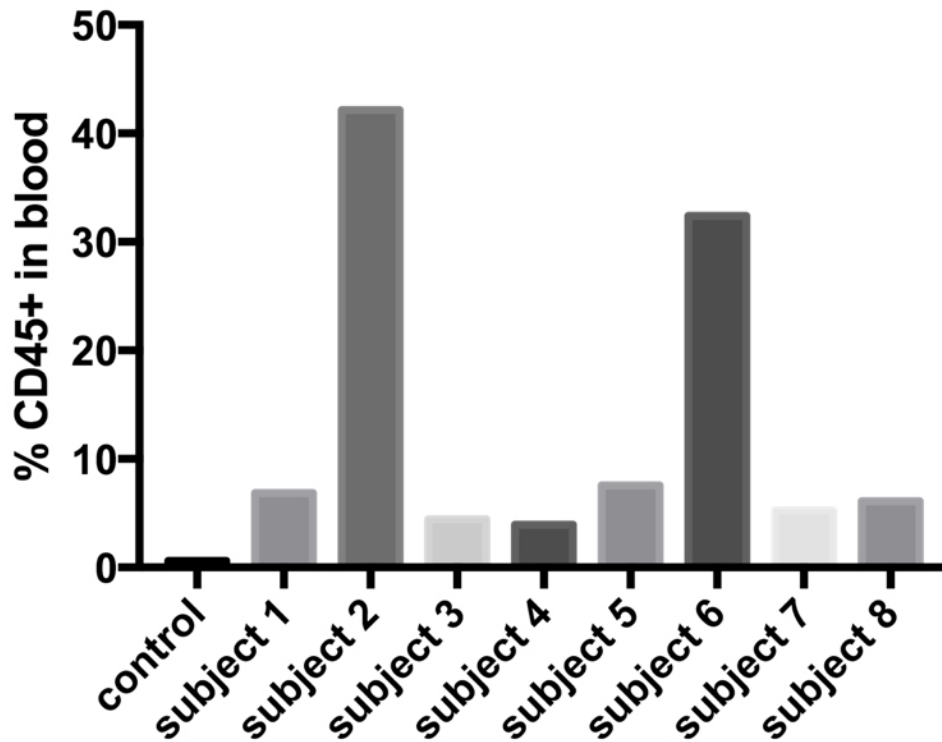

**Supplementary Fig. S7.** Eight mice of CD19 CAR-Trap group were bled on day 61 post-treatment of  $4 \times 10^6$  CAR-T cells. The blood samples were lysed to remove red blood cells and then processed for T cell analysis. The percentages of T cells in blood of each mouse were shown in bar graphs.
